# Supplementary material for: SupT1 Cell Infusion as a Possible Cell-Based Therapy for HIV: Results from a Pilot Study in Hu-PBMC BRGS Mice
Source: MDPI journal article supplement (doi:10.3390/vaccines4020013), 2016-04-26

# FACS dot plots

TIME: +1 WEEK

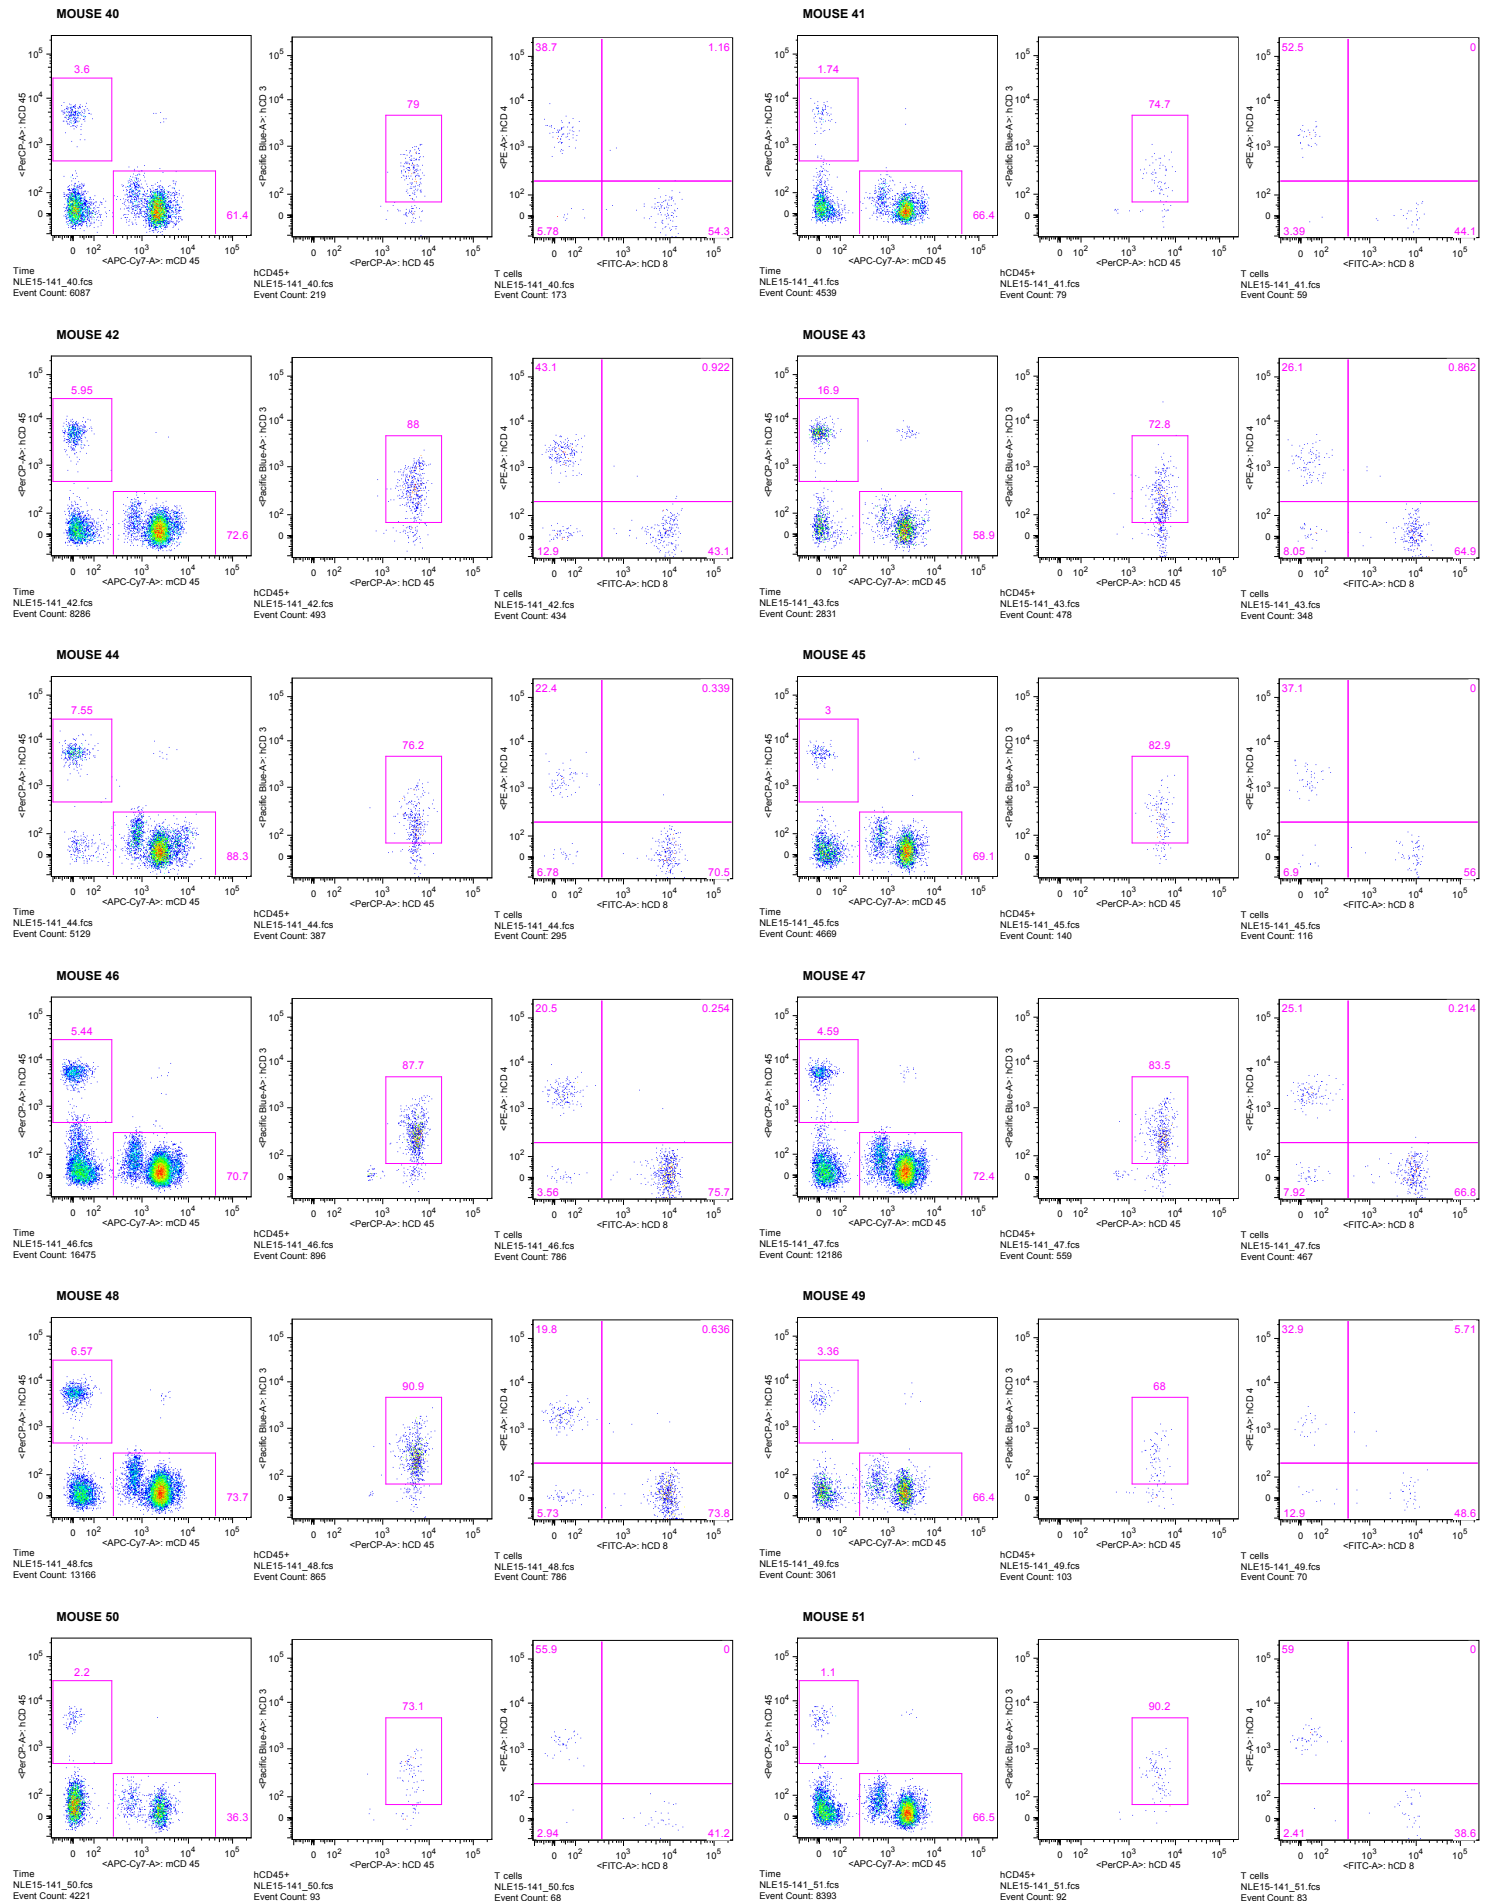

# FACS dot plots

TIME: +1 WEEK

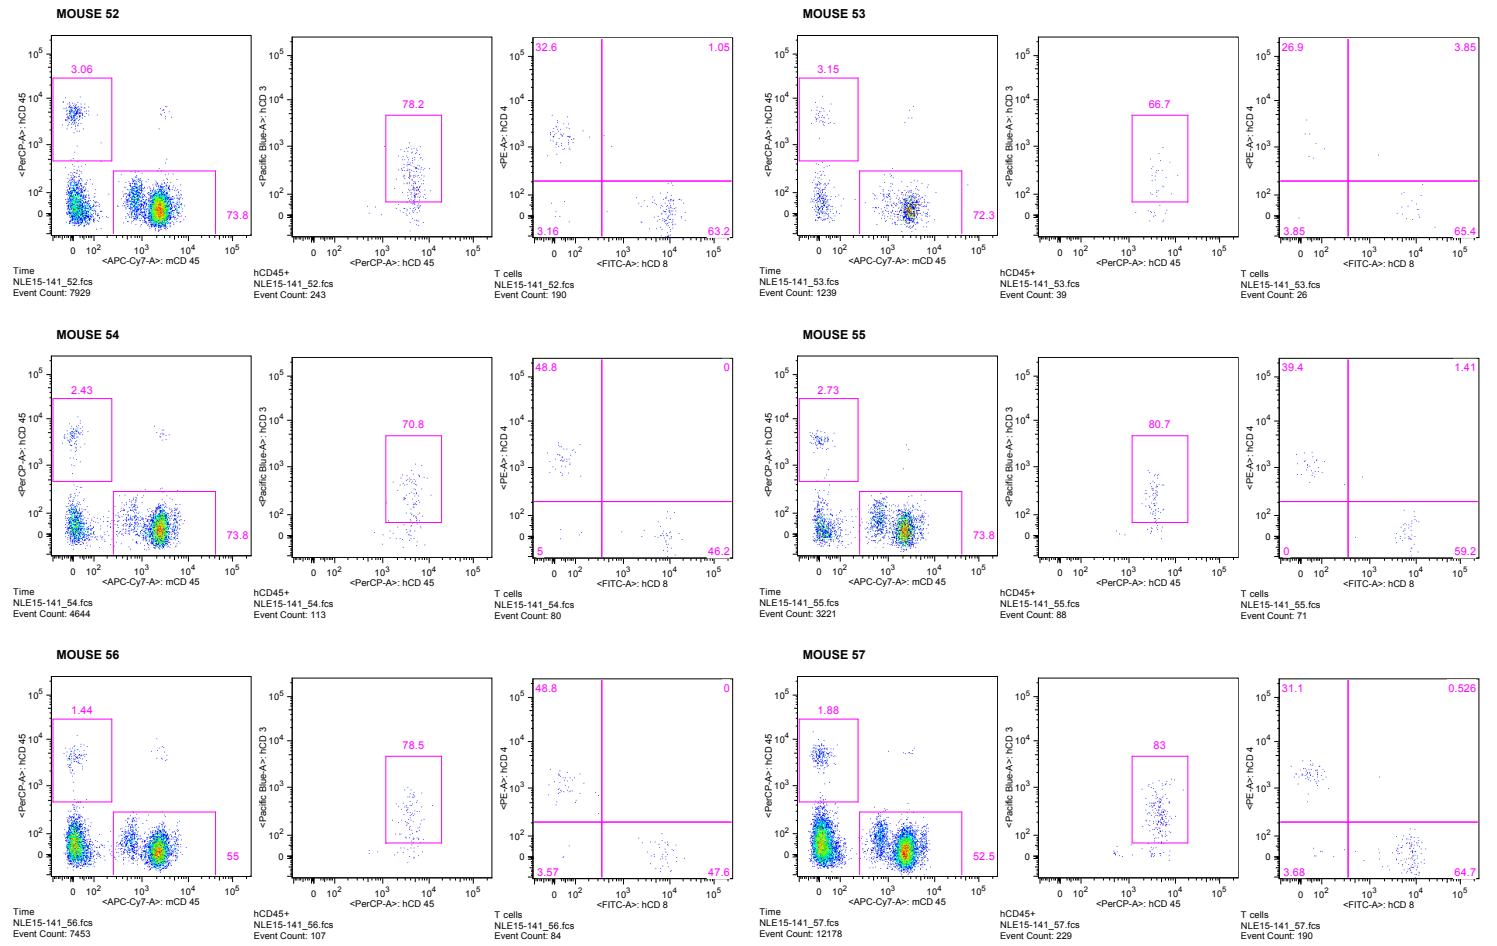

# FACS dot plots

TIME: +2 WEEKS

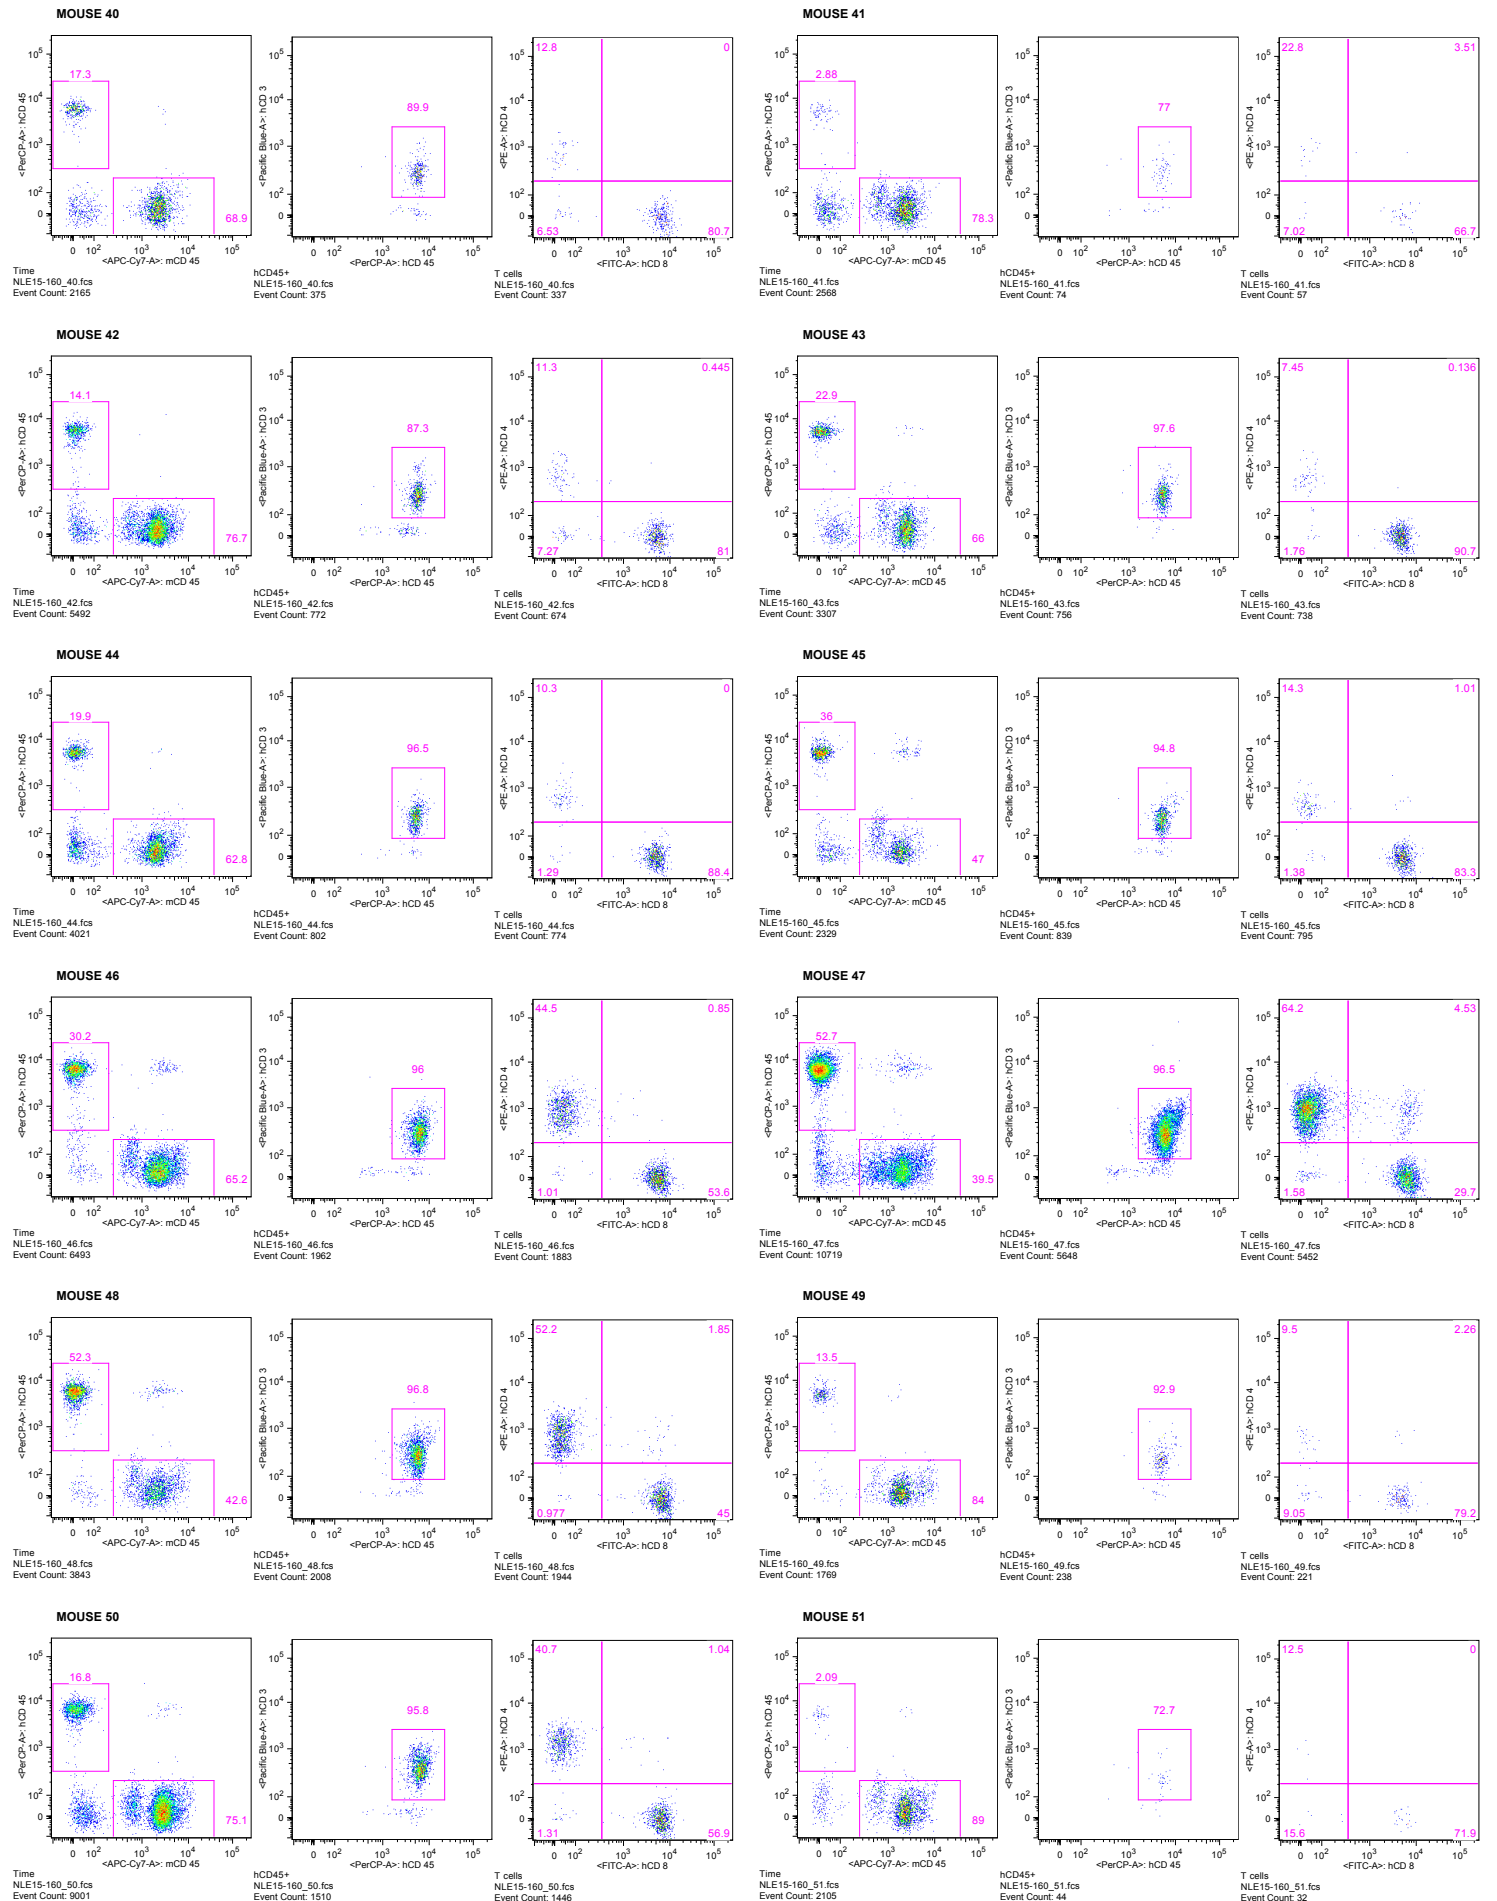

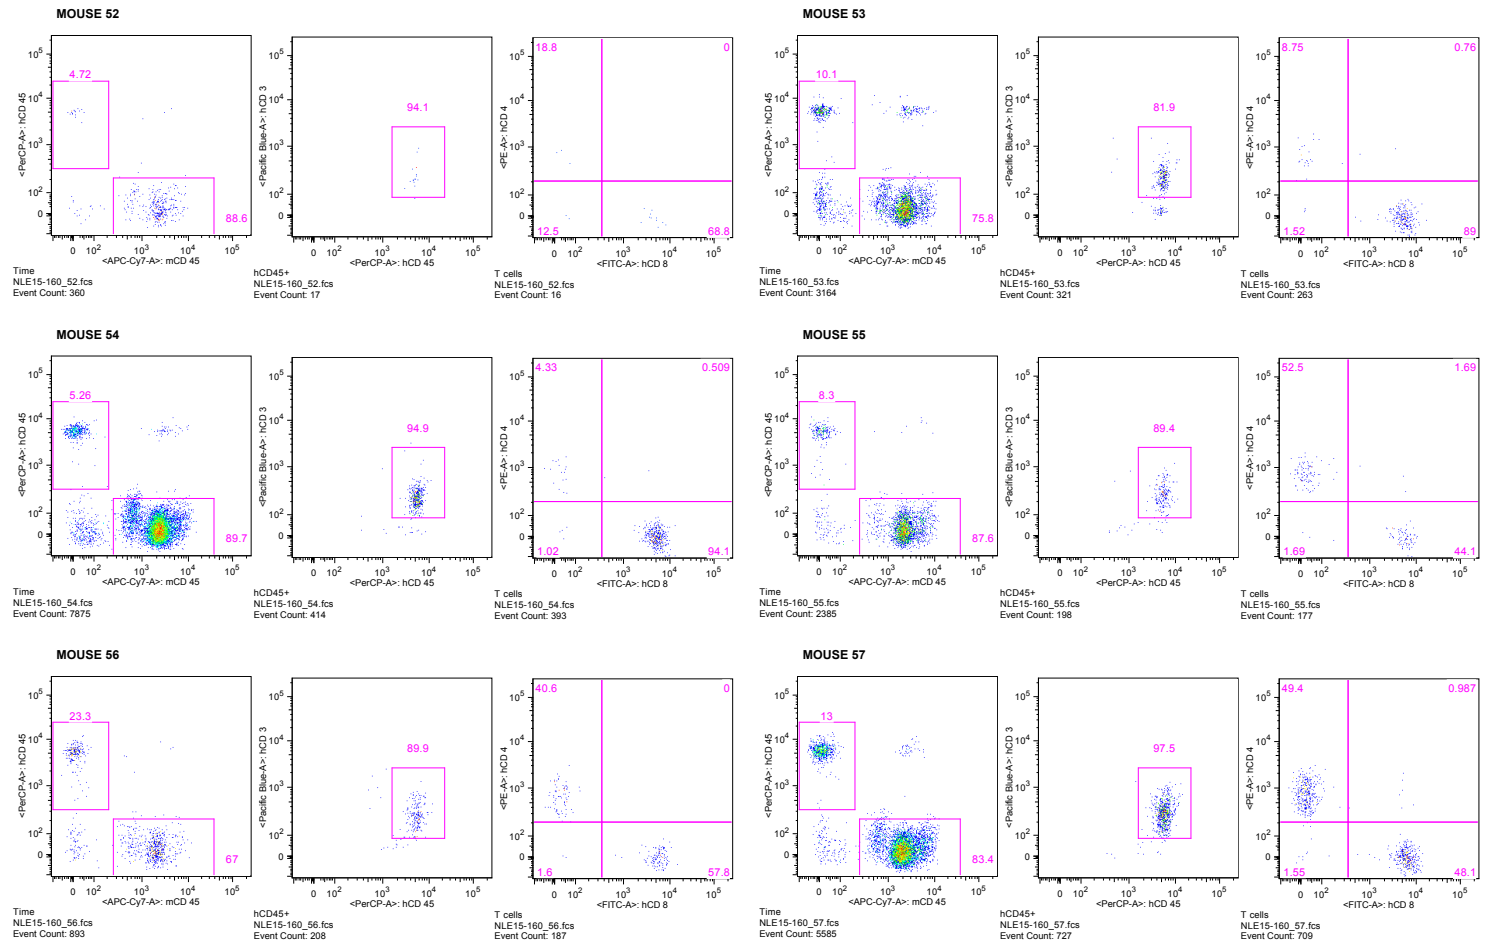

# FACS dot plots

TIME: +3 WEEKS

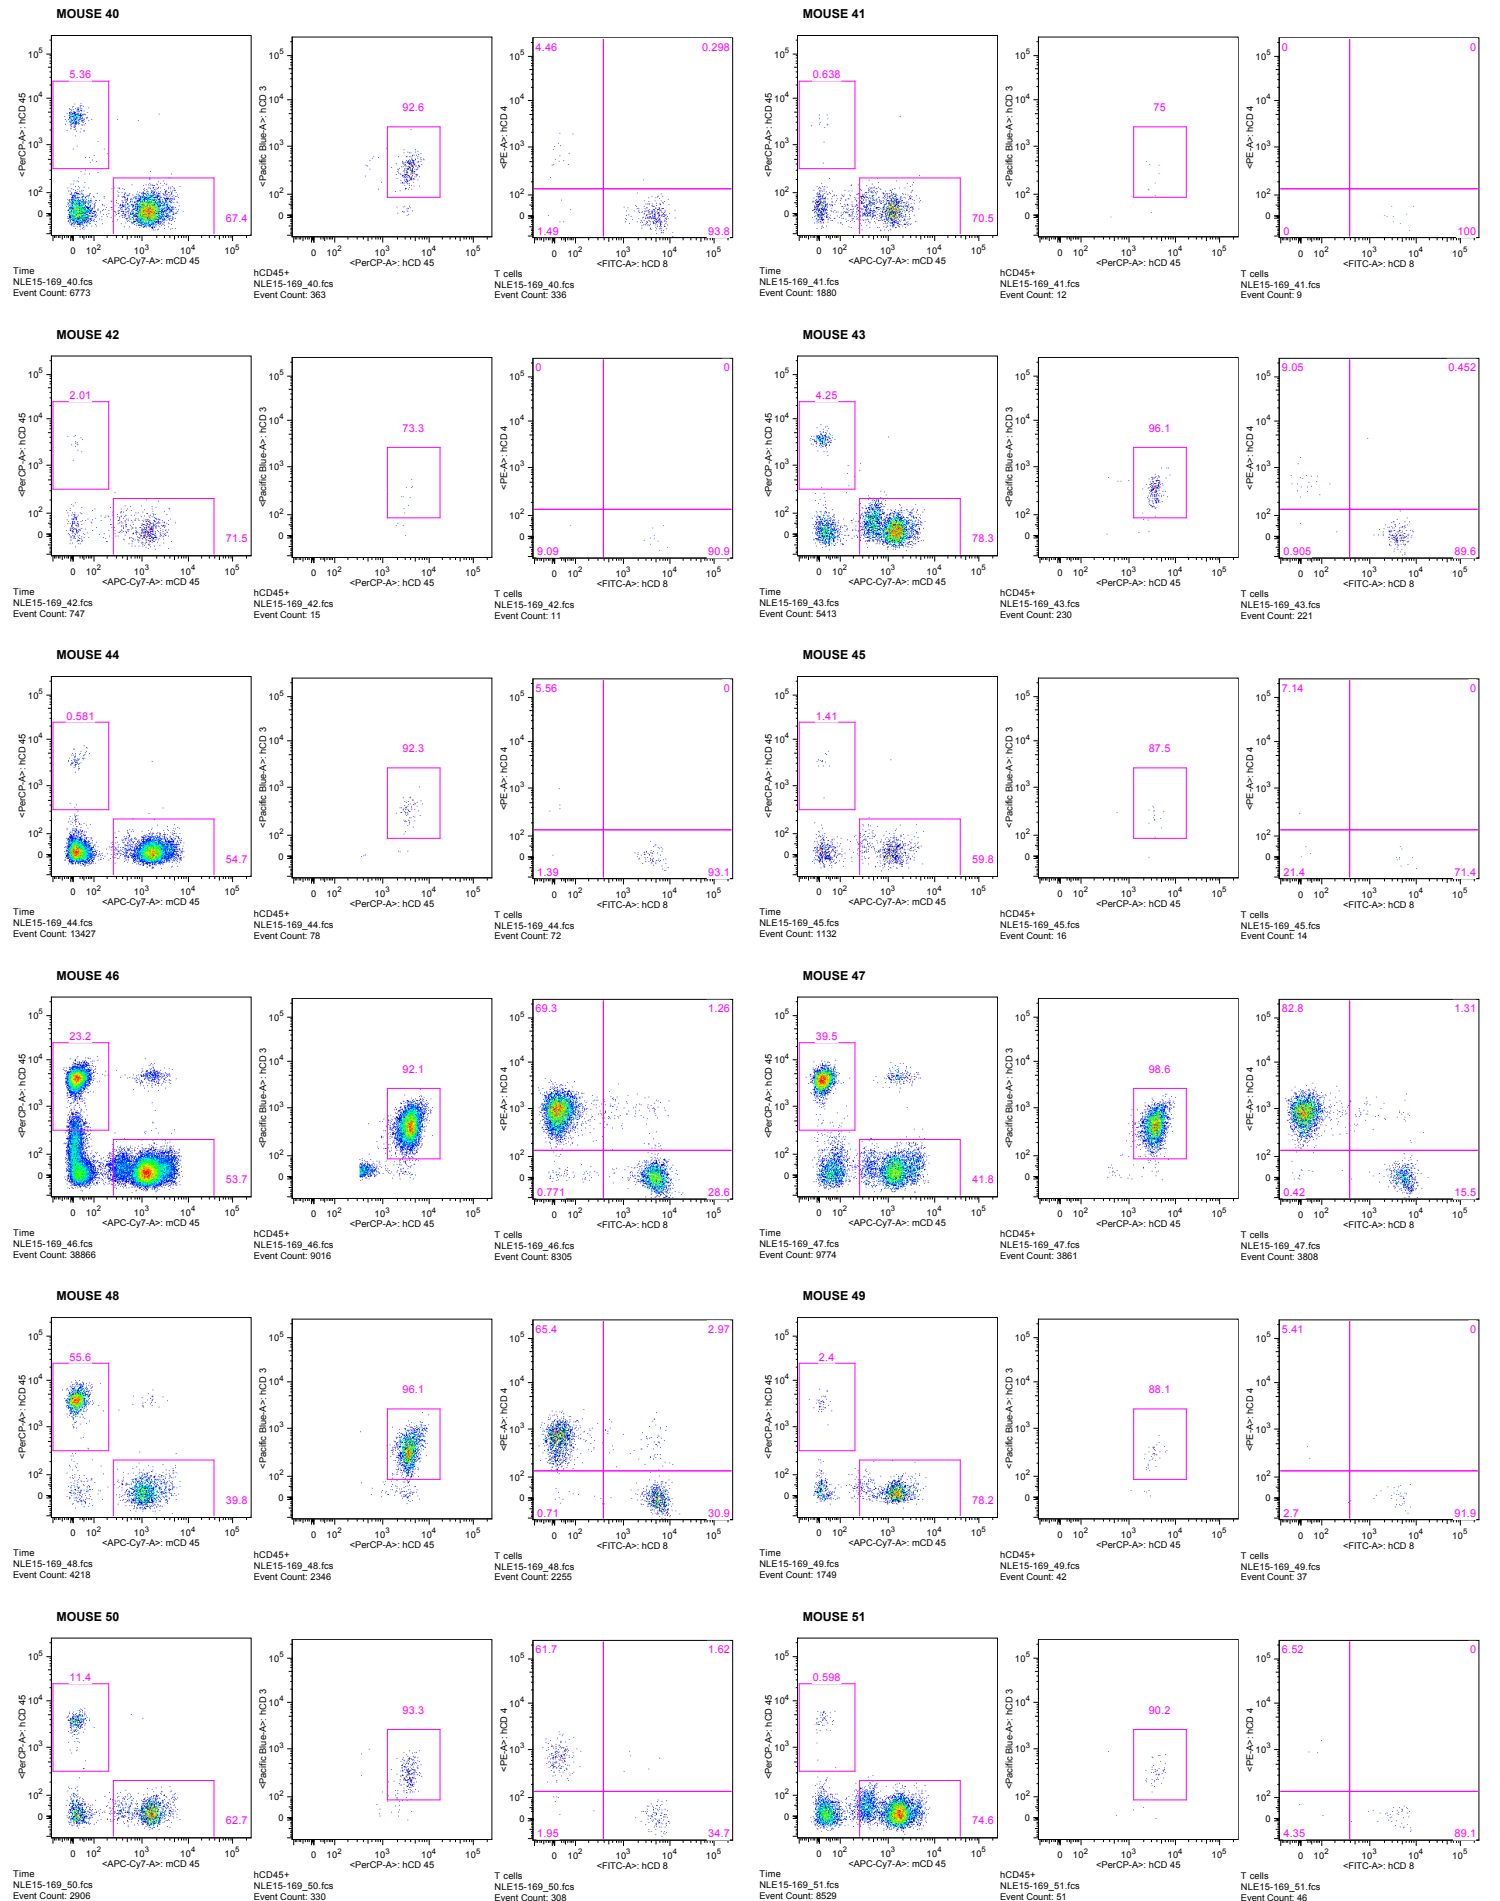

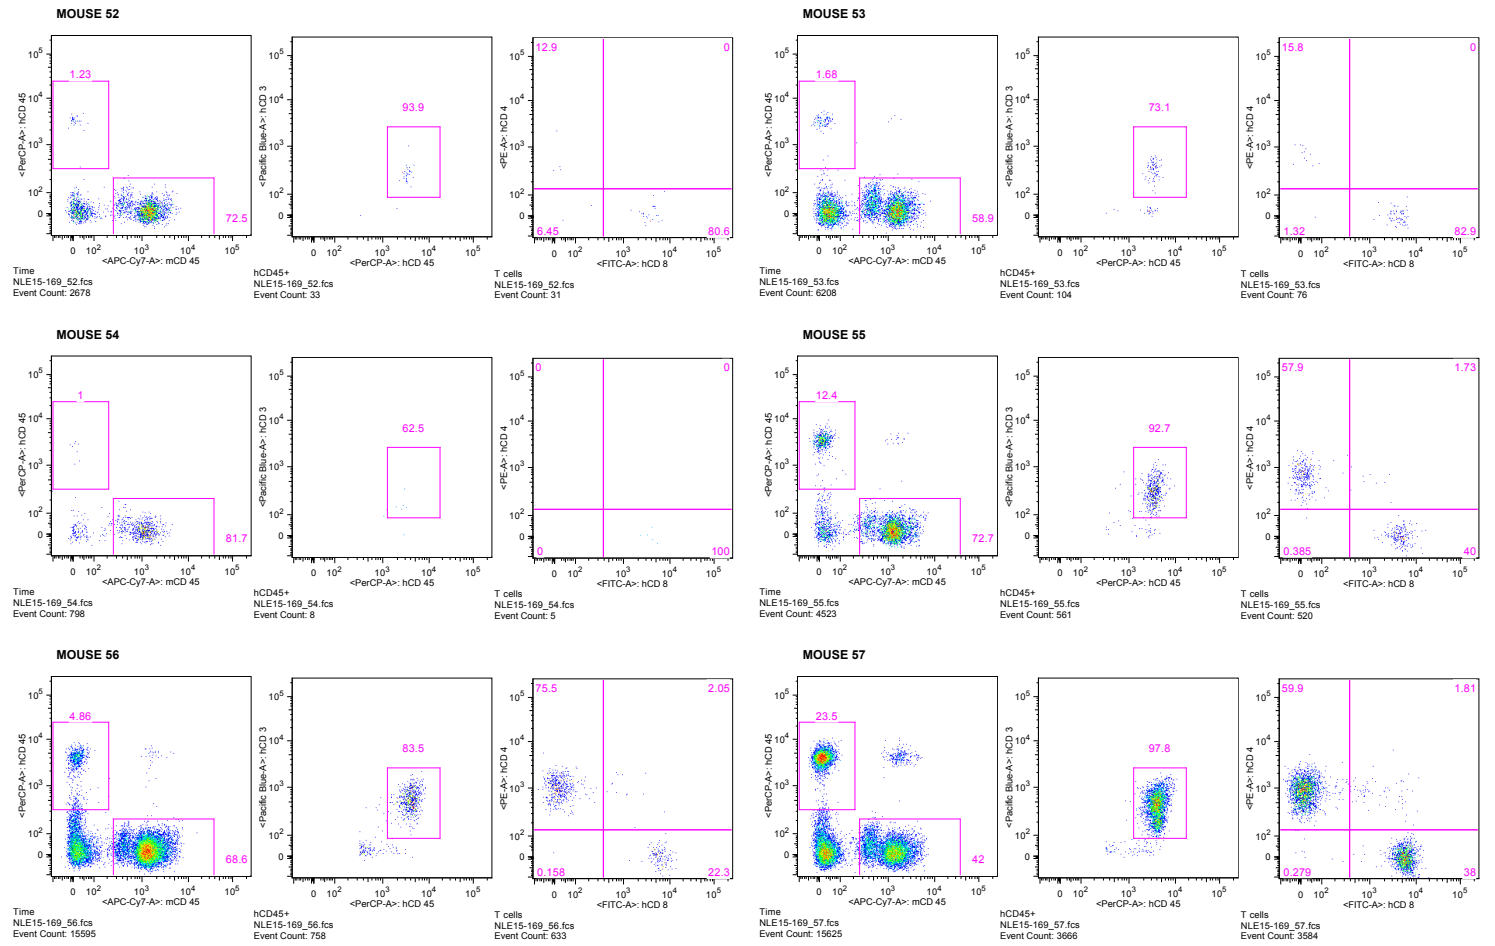

# FACS dot plots

TIME: +4 WEEKS

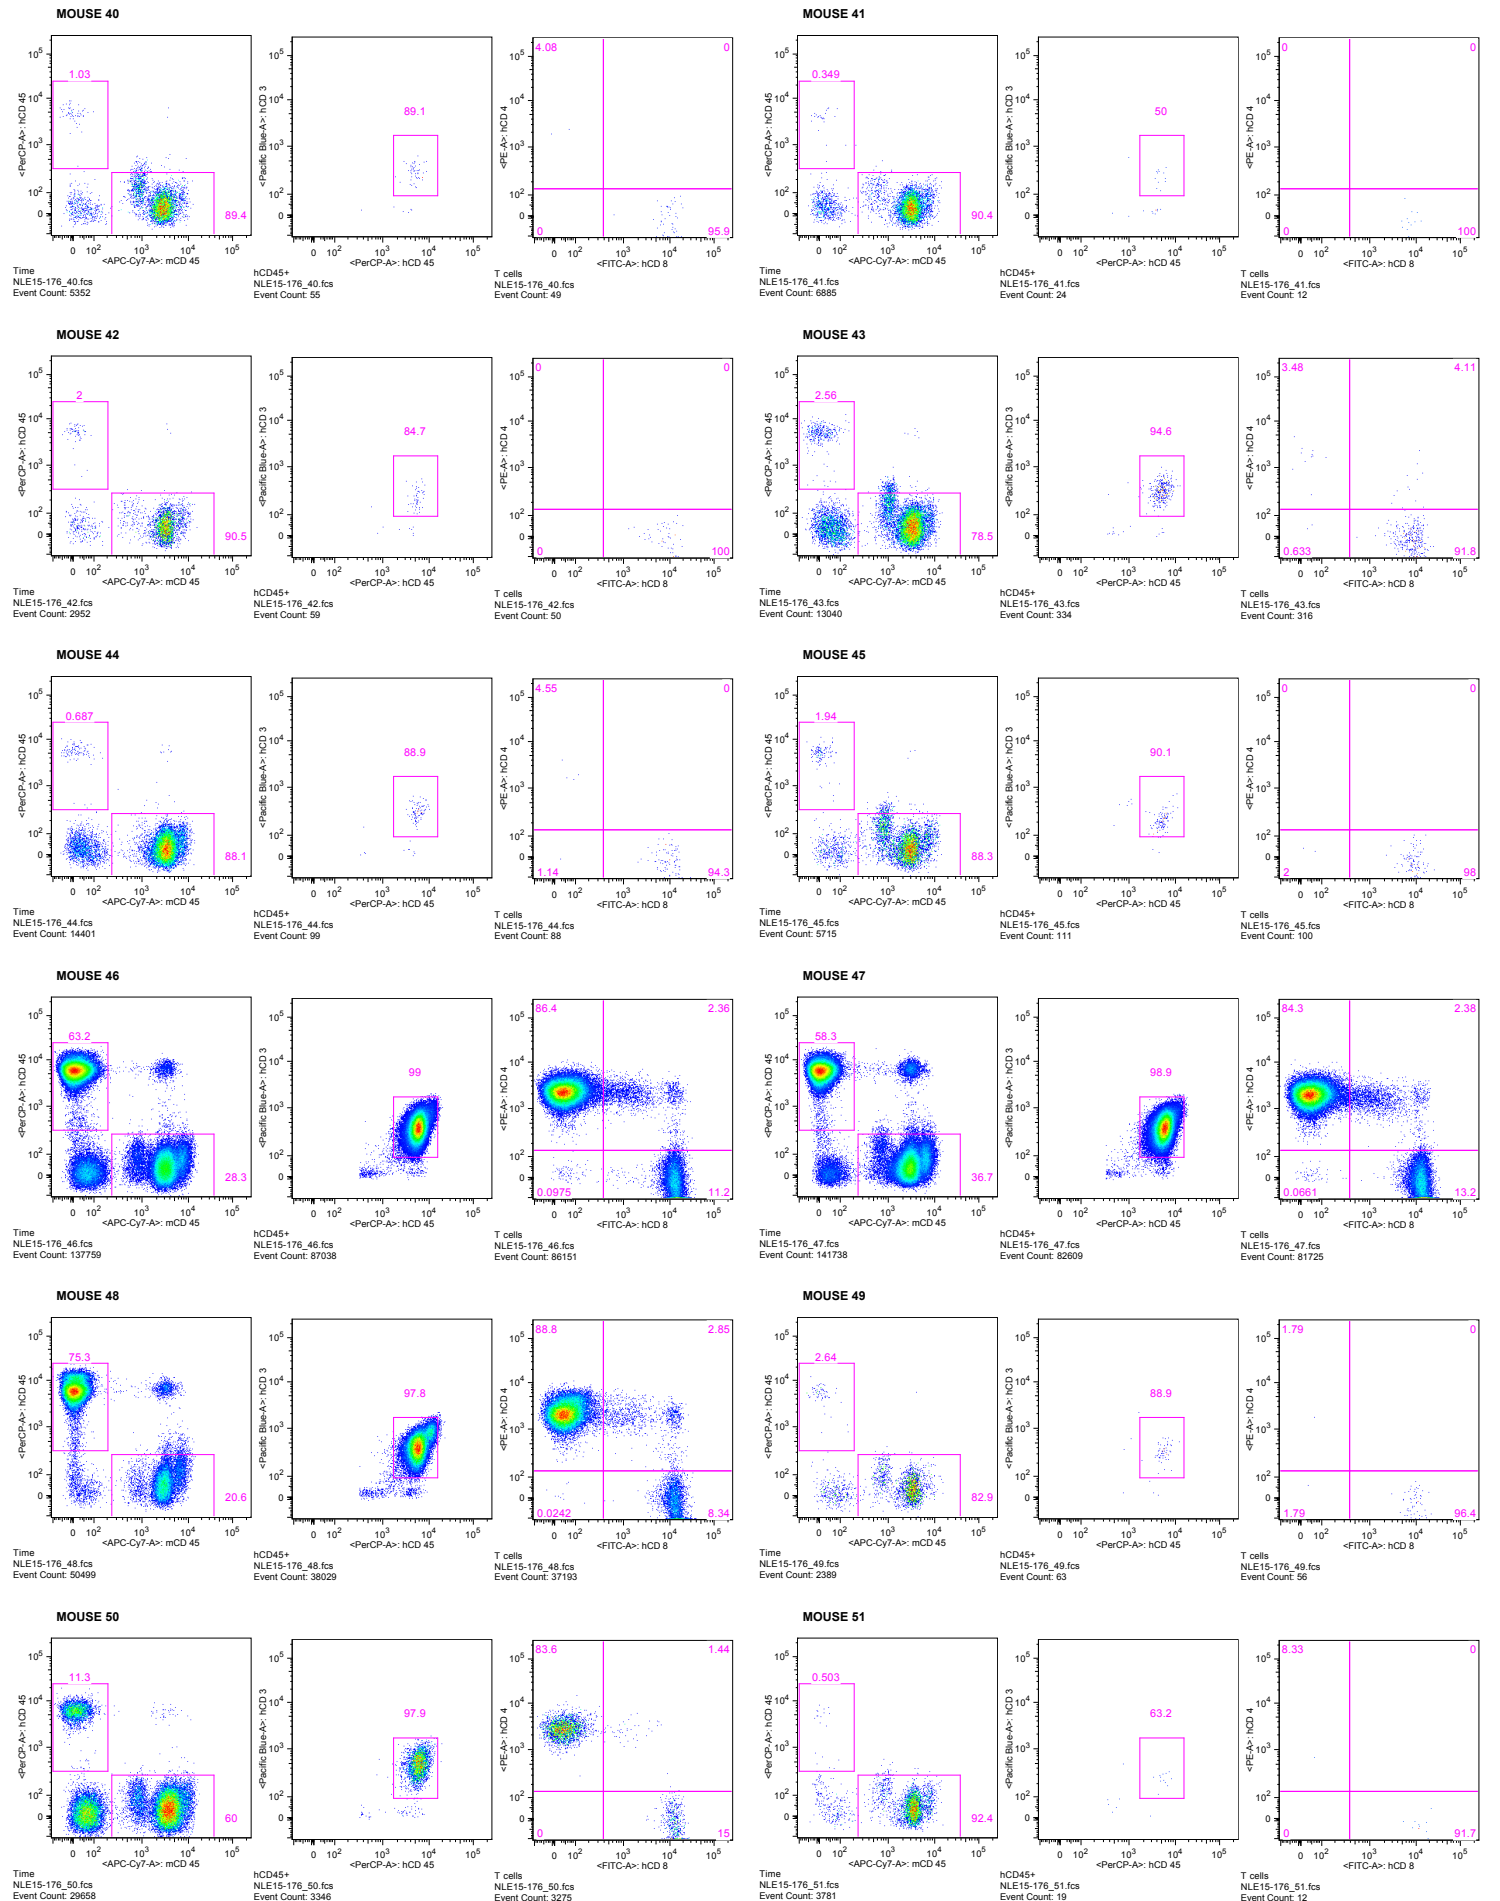

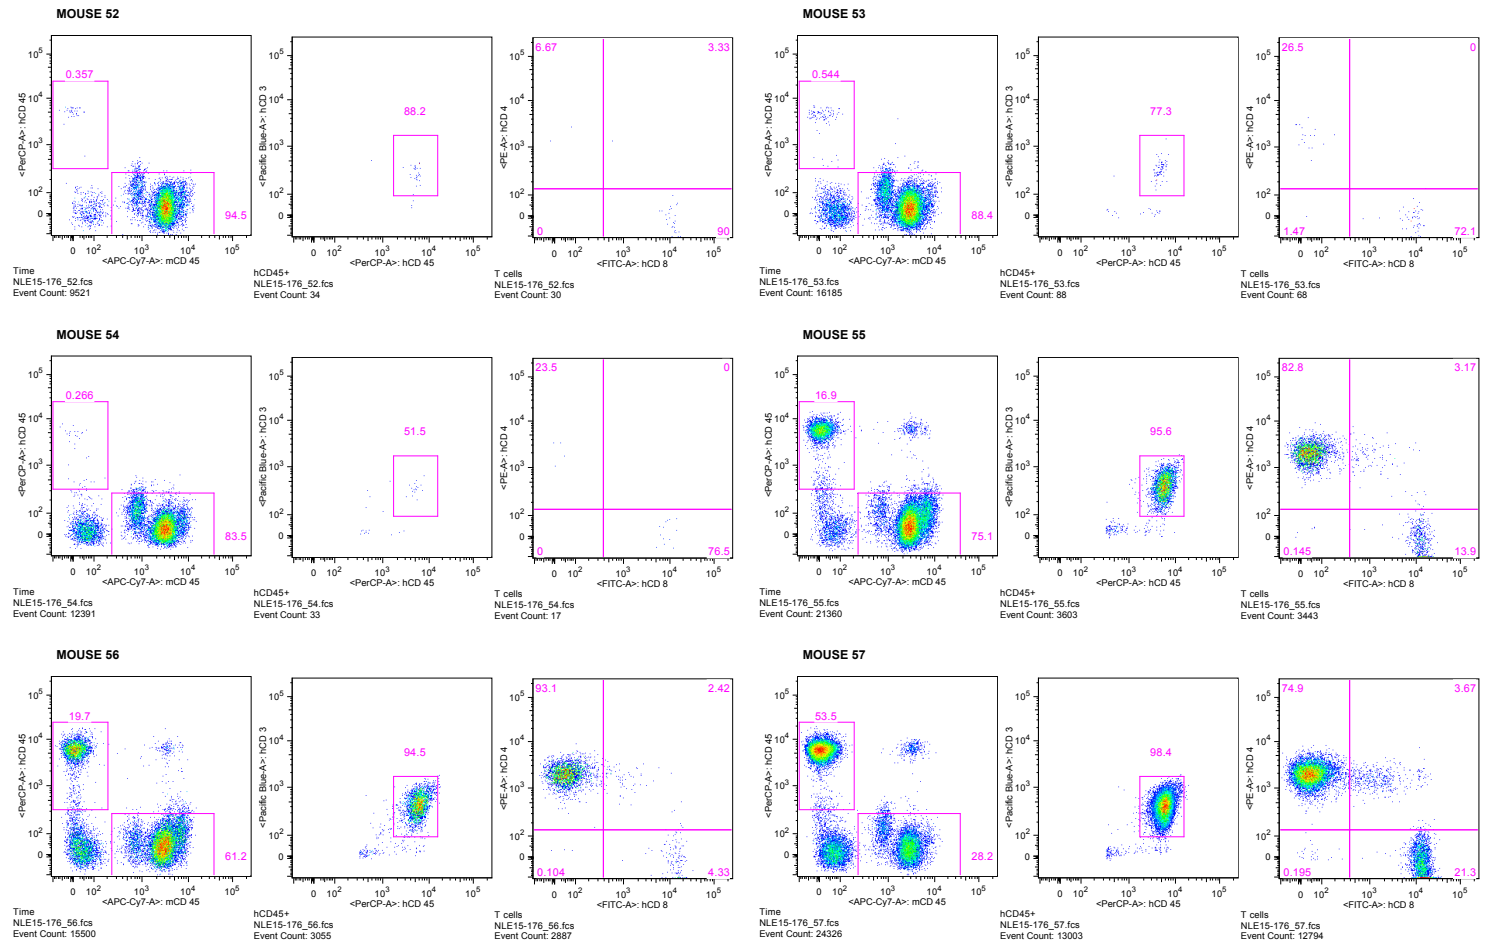

Supplement: s1 [file s1]
